# Supplementary material
Source: PubMed Central journal article supplement (PMC5604469)

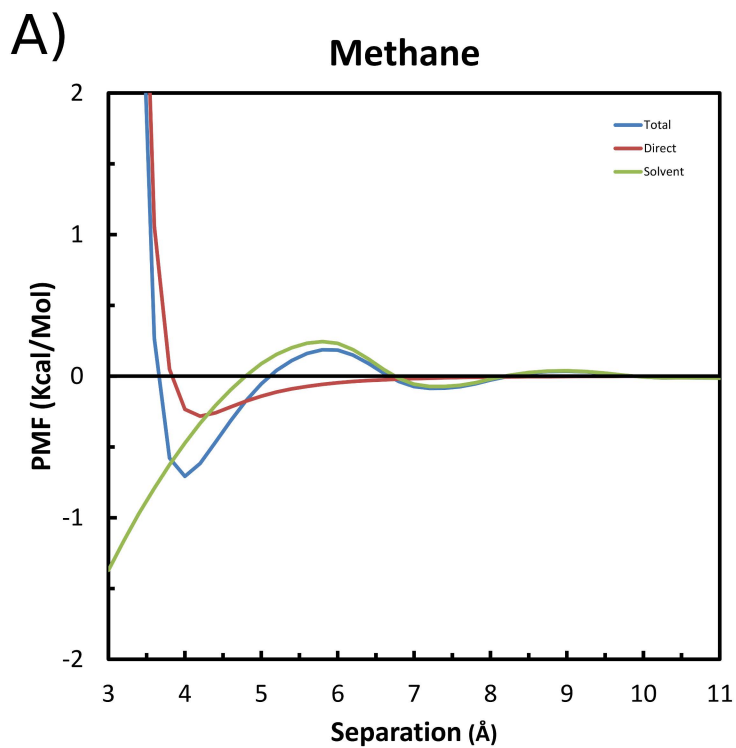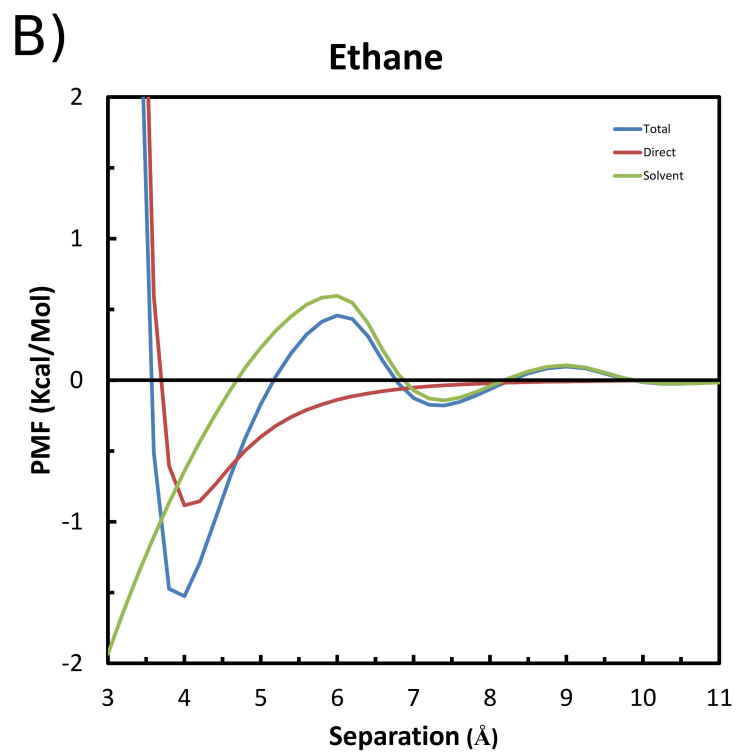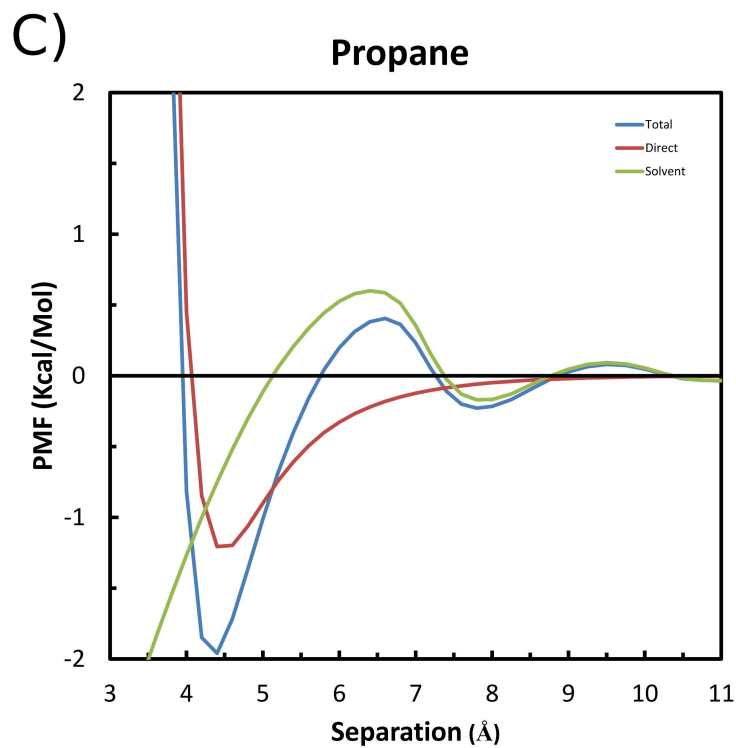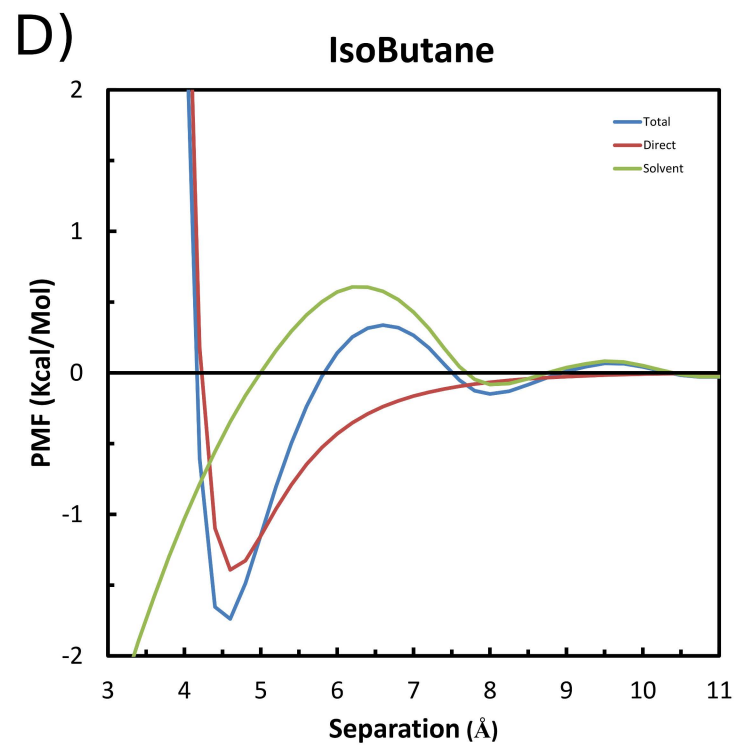

# 2 hydroxyls bridged by solvent

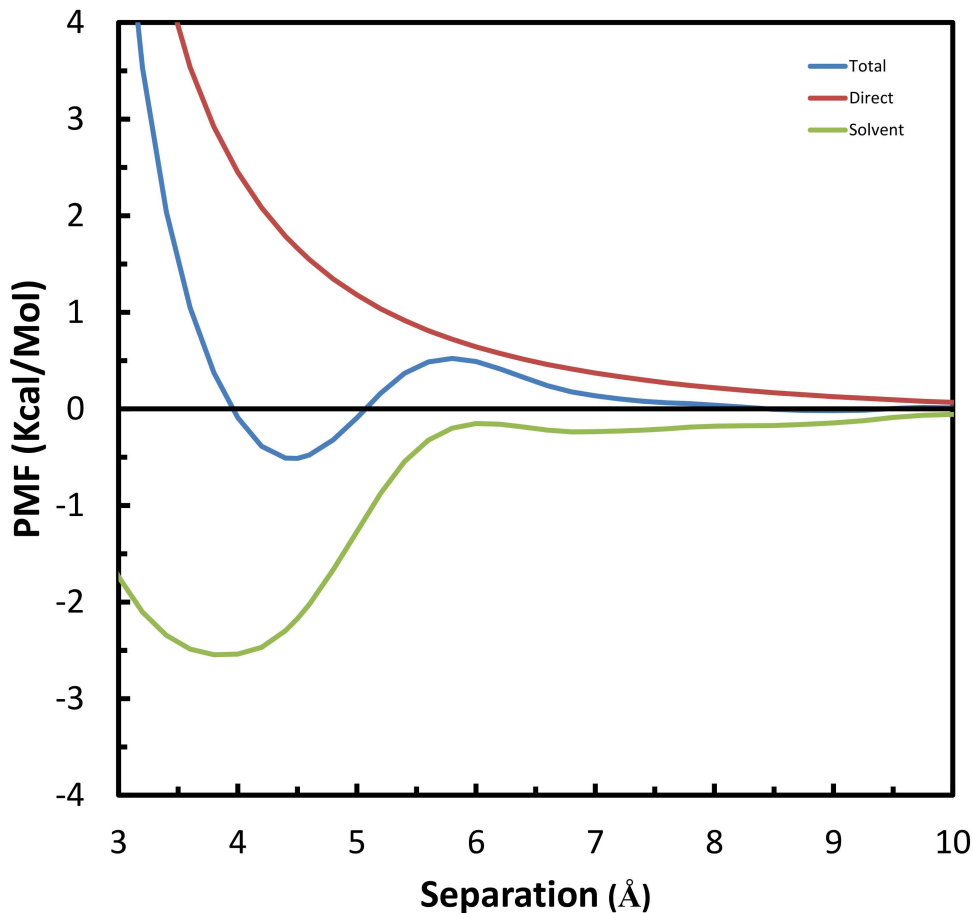

# 3 hydroxyls bridged by solvent

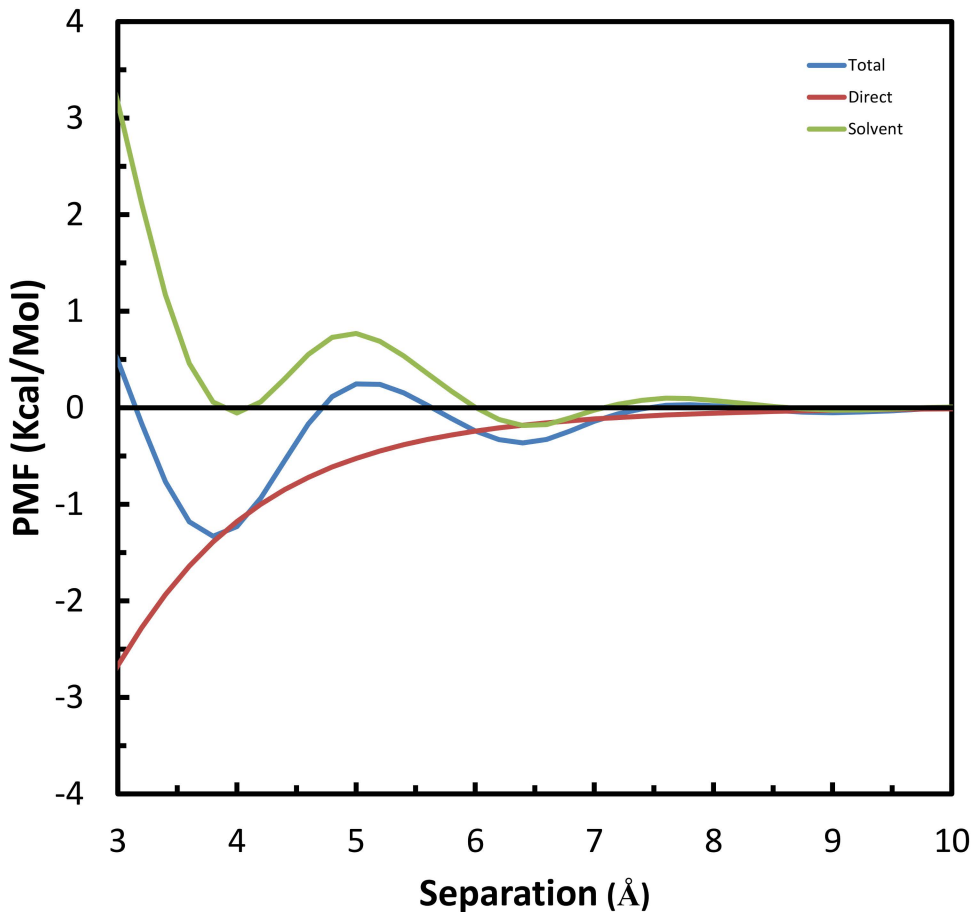

# 4 hydroxyls bridged by solvent

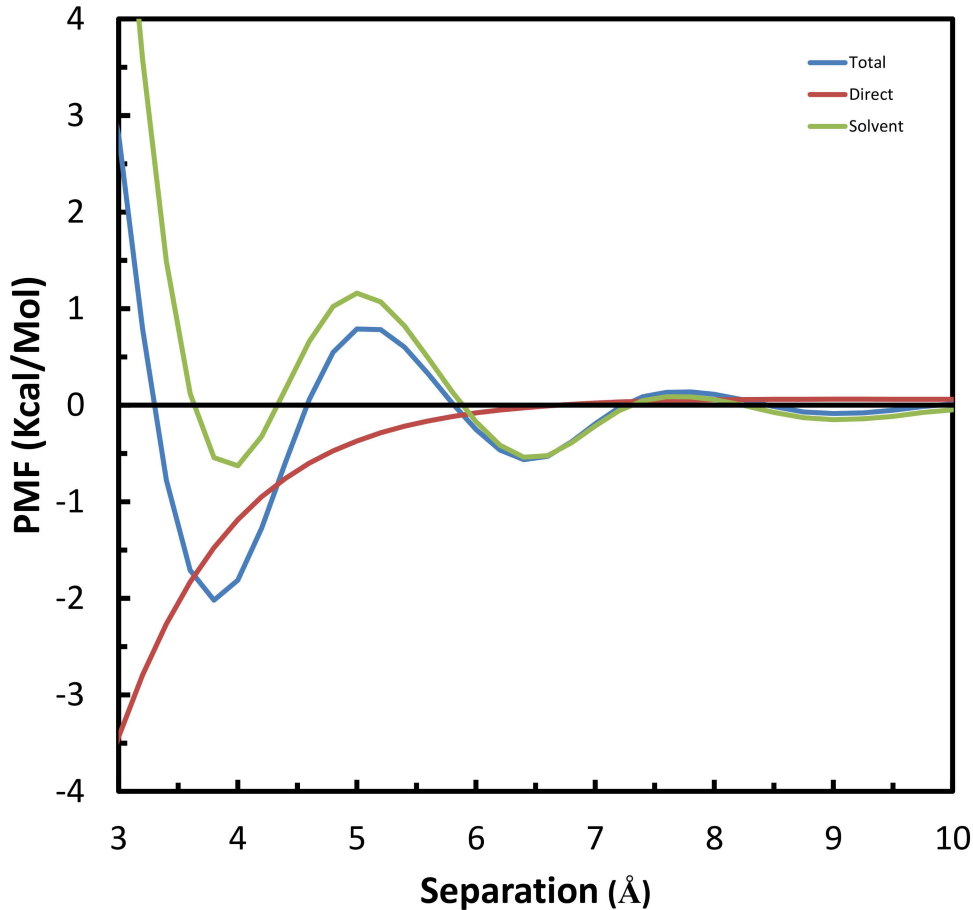

# 2 hydroxyls hydrogen bonding

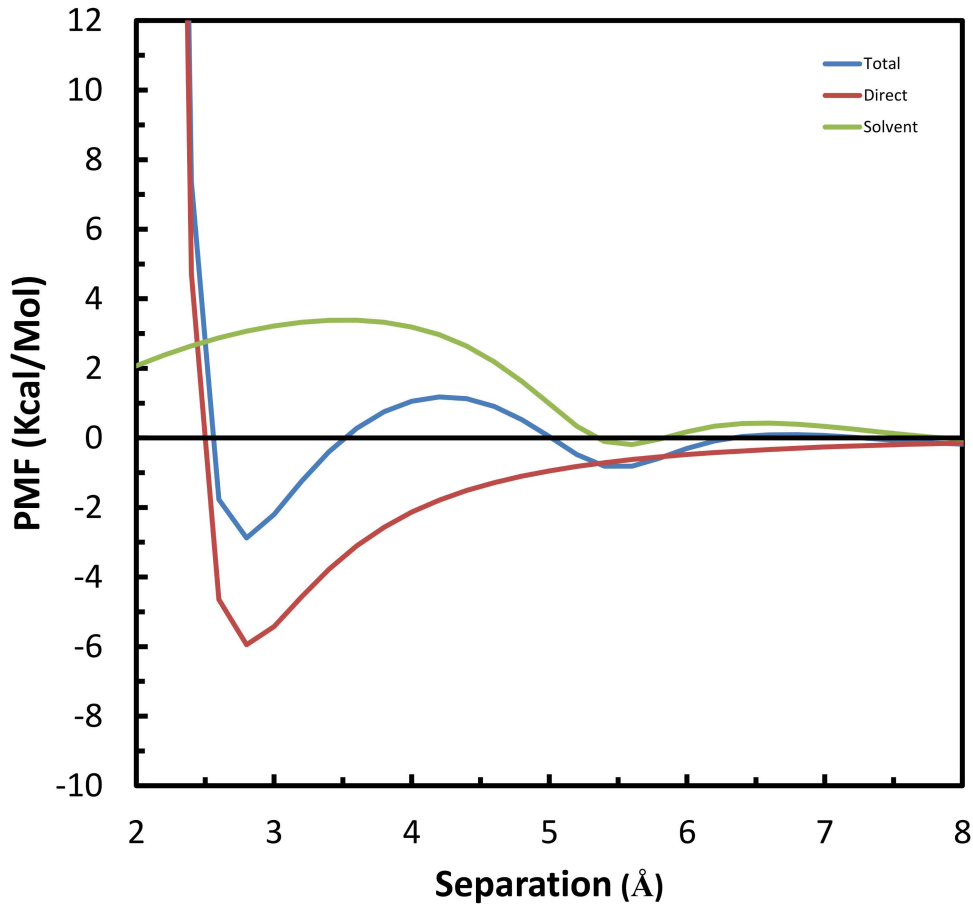

# 3 hydroxyls hydrogen bonding

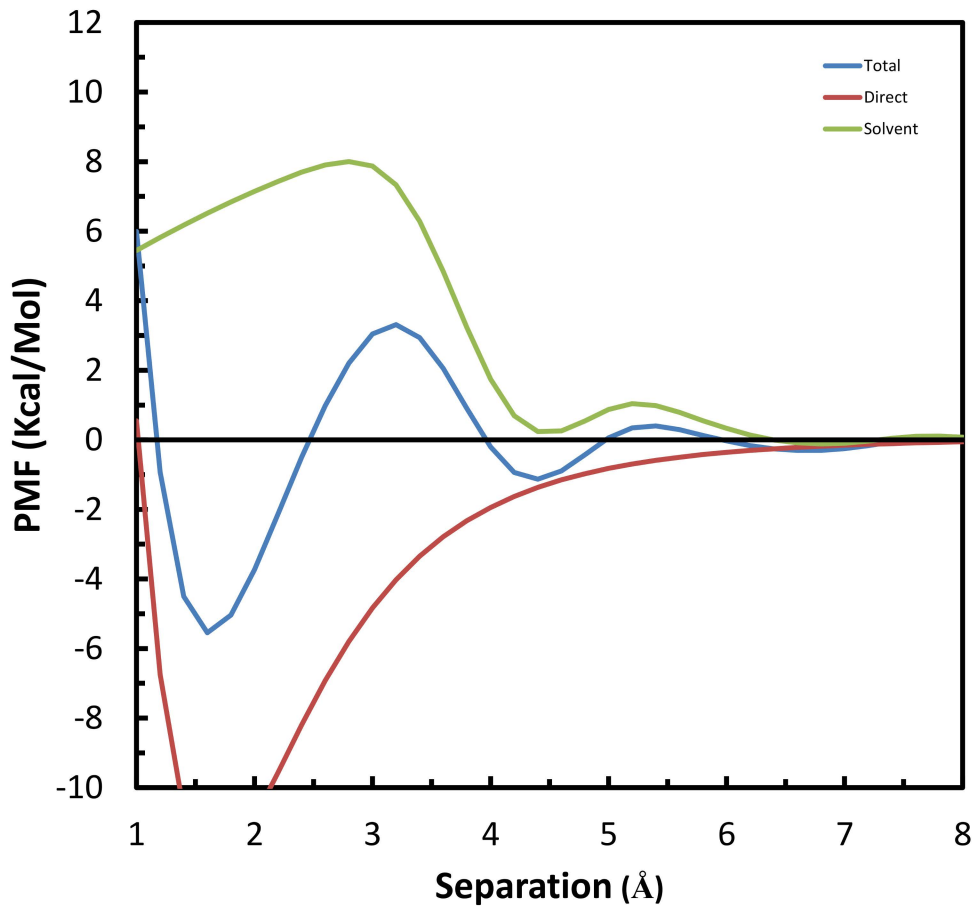

# 4 hydroxyls hydrogen bonding

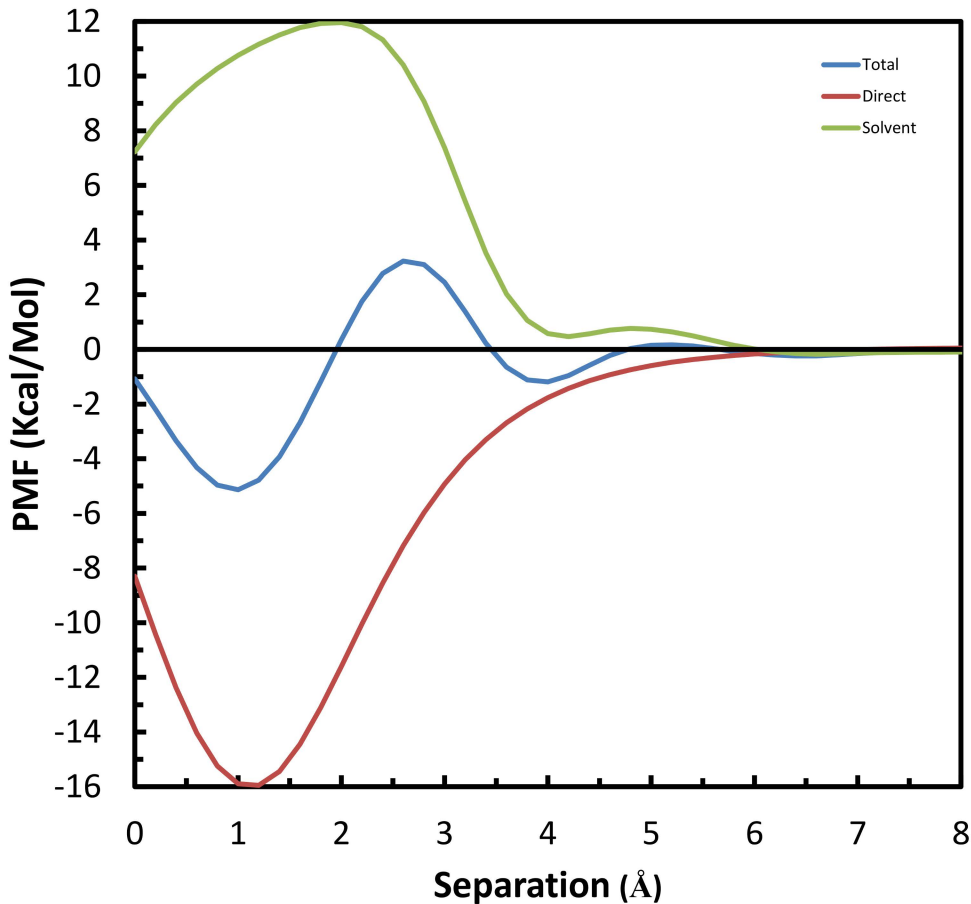

Supplement: NIHMS866205-supplement-Supp_Fig_S1-7.pdf [file NIHMS866205-supplement-Supp_Fig_S1-7.pdf]
